# Supplementary material for: Evaluating the impact of climate communication activities by scientists: What is known and necessary?
Source: Copernicus journal article supplement (doi:10.5194/egusphere-2023-2730), 2023-12-08
Supplement: Supplementary file [file egusphere-2023-2730-CC1-supplement.pdf]

**Caveat:** This is a brief community comment, in which the authors and editors should note a potential conflict of interest as I am an Exec. Editor of *Geoscience Communication* [Not handling editor for this manuscript] and because I'm clearly pointing to my own work.

**Comment:** I do not pretend a full overview of this subject area, but have a few specific pieces of knowledge that the authors might consider incorporating. The two non-editorials might either be outside the scope of the authors definitions of 'communicating climate science', or out of scope due to their publication/submission date. However, very briefly noting them might help (i) sharpen their definition/scope which I didn't read as excluding the suggestions I make and (ii) and potentially recognise upcoming work.

**Use the community?** There may also be an opportunity to ask the community to contribute examples they know by commenting on the discussion paper.

**Why are the following out of scope?**

- <https://gc.copernicus.org/articles/1/35/2018/> - Contains a communication activity that is evaluated.
- Suggest the authors review papers published in *Geoscience Communication*.

**Detail of 4 papers:** In Section 2.1 'Importance of Evaluation', it might be worth noting that this aligns entirely with GCs principles for publication as outlined in two editorials

- <https://gc.copernicus.org/articles/1/1/2018/>
- <https://gc.copernicus.org/articles/4/493/2021/>

There is also a paper of mine that was in *GC Discussions* since June 2023 on 'A tool to co-create impactful university-industry projects for natural hazard risk mitigation', which contains an evaluation (Case Study) of a project on climate-driven hydrological risk.

<https://egusphere.copernicus.org/preprints/2023/egusphere-2023-1251/>

The project output is a blog published by the Bank of England -

<https://bankunderground.co.uk/2021/04/08/its-windy-when-its-wet-why-uk-insurers-may-need-to-reassess-their-modelling-assumptions/>

I have also just submitted a GC Insights paper (after the submission of your manuscript) explicitly to evaluate a project to communicate climate related risk.

- The output of that work is <https://bankunderground.co.uk/2023/04/13/what-if-its-a-perfect-storm-stronger-evidence-that-insurers-should-account-for-co-occurring-weather-hazards/>
- 'Open R-code to communicate the impact of co-occurring natural hazards' - egusphere-2023-2799. <https://egusphere.copernicus.org/preprints/2023/egusphere-2023-2799/>

All the best,

John Hillier
